# Supplementary material for: Advancing terrestrial snow depth monitoring with machine learning and L-band InSAR data: a case study using NASA’s SnowEx 2017 data
Source: Frontiers journal article supplement (doi:10.3389/frsen.2024.1481848), 2025-01-22
Supplement: Data_Sheet_1.pdf [file Data_Sheet_1.pdf]

## Supplementary Material

### 1. Hyperparameter Tuning Details

The hyperparameter tuning for all models (Extra Trees, Feed-forward Neural Network, and XGBoost) was conducted using Optuna with the Tree-structured Parzen Estimator (TPE) Sampler. Each tuning process involved 100 trials, and the optimal hyperparameters were determined based on minimizing the Root Mean Squared Error (RMSE) on the tuning (validation) set.

**Table S1:** Hyperparameter Tuning Configuration for Extra Trees

| Hyperparameter        | Range Explored                                                                                                  | Optimal Value |
|-----------------------|-----------------------------------------------------------------------------------------------------------------|---------------|
| Number of Trees       | 100-1200                                                                                                        | 150           |
| Maximum Depth         | 5-20, None                                                                                                      | None          |
| Minimum Samples Split | 2-10                                                                                                            | 2             |
| Minimum Samples Leaf  | 1-10                                                                                                            | 1             |
| Criterion             | <ul style="list-style-type: none"><li>• Squared Error</li><li>• Absolute Error</li><li>• Friedman MSE</li></ul> | Squared Error |

**Table S2:** Hyperparameter Tuning Configuration for XGBoost

| Hyperparameter  | Range Explored                                                                                                       | Optimal Value |
|-----------------|----------------------------------------------------------------------------------------------------------------------|---------------|
| Number of Trees | 100-1200                                                                                                             | 1000          |
| Maximum Depth   | 5-20, 0                                                                                                              | 0             |
| Learning Rate   | 0.01-0.5                                                                                                             | 0.05          |
| Subsample       | 0.5-1.0                                                                                                              | 1.0           |
| Objective       | <ul style="list-style-type: none"><li>• Squared Error</li><li>• Squared Log Error</li><li>• Absolute Error</li></ul> | Squared Error |
| Maximum Bin     | 1000 – 6000                                                                                                          | 5096          |
| Tree Method     | <ul style="list-style-type: none"><li>• Exact</li><li>• Approximate</li><li>• Histogram</li></ul>                    | Histogram     |

**Table S3:** Hyperparameter Tuning Configuration for FNN

| Hyperparameter       | Range Explored                                                                    | Optimal Value    |
|----------------------|-----------------------------------------------------------------------------------|------------------|
| Hidden Layers        | 1-5                                                                               | 3                |
| Neurons per Layer    | 128-5000                                                                          | 2048, 1500, 1000 |
| Learning Rate        | 1e-5 - 1e-2                                                                       | 1e-4             |
| Batch Size           | 16-256                                                                            | 128              |
| Activation Functions | <ul style="list-style-type: none"><li>ReLU</li><li>Tanh</li><li>Sigmoid</li></ul> | ReLU             |

## 2. Feature Importance Plots Open and Vegetated Areas

Since the XGBosst has the best performance overall, the following feature importance plots are based on the XGBoost model.

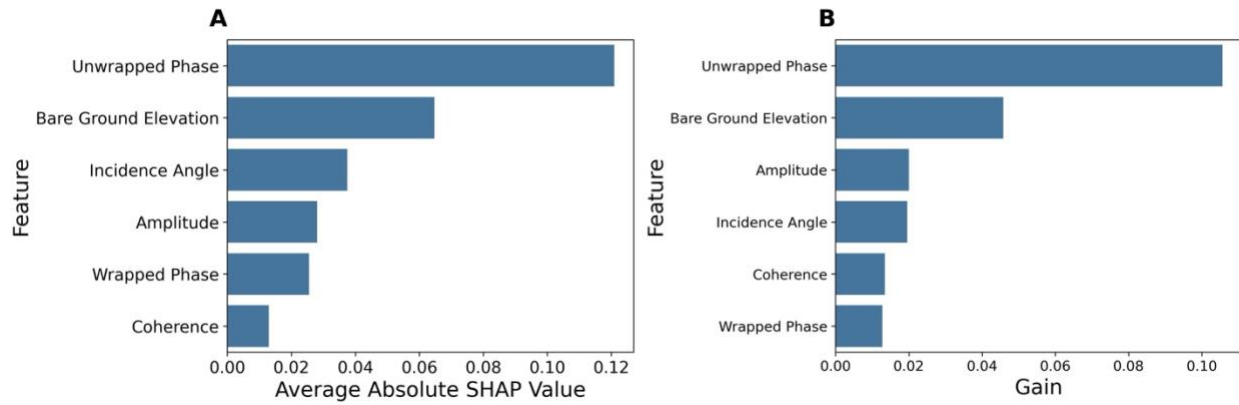

**Figure S1:** Feature Importance in Open Areas: (A) SHAP Importance (B) Impurity-based importance

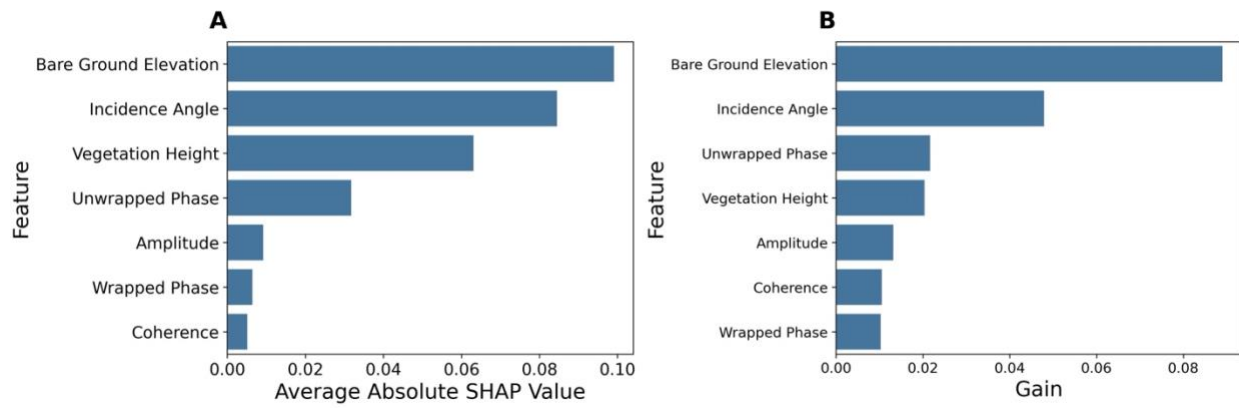

**Figure S2:** Feature Importance in Vegetated Areas: (A) SHAP Importance (B) Impurity-based importance
